# Supplementary material for: Ursolic Acid Regulates Intestinal Microbiota and Inflammatory Cell Infiltration to Prevent Ulcerative Colitis
Source: PubMed Central journal article supplement (PMC8111854; doi:10.1155/2021/6679316), 2021-04-30

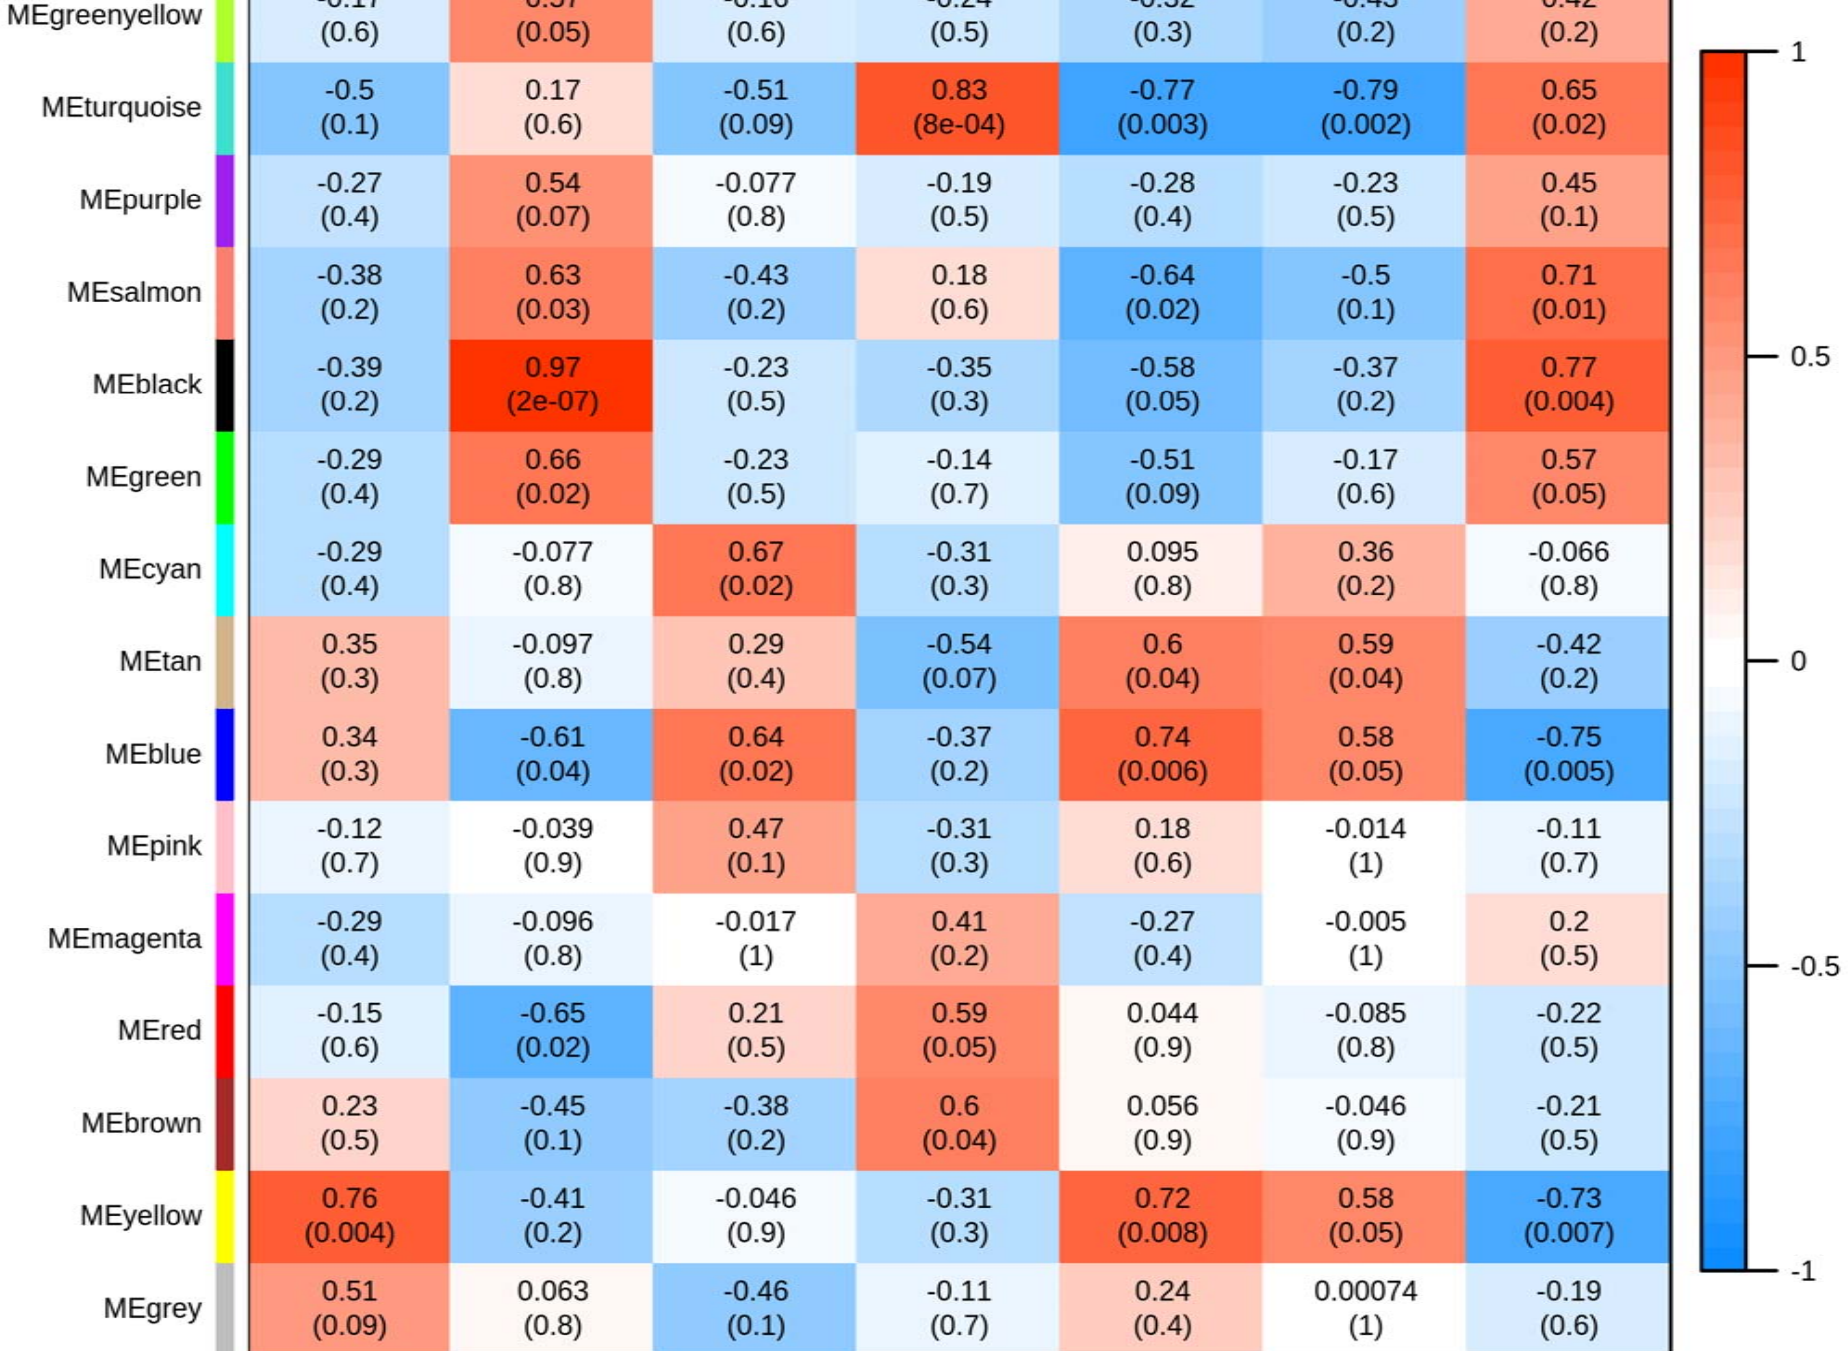

Supplement: 6679316.f1.pdf [file 6679316.f1.pdf]
